# Supplementary material
Source: PubMed Central journal article supplement (PMC3081388)
Supplement: NIHMS278318-supplement-1.pdf [file NIHMS278318-supplement-1.pdf]

# Supplemental Material

## Fig. I

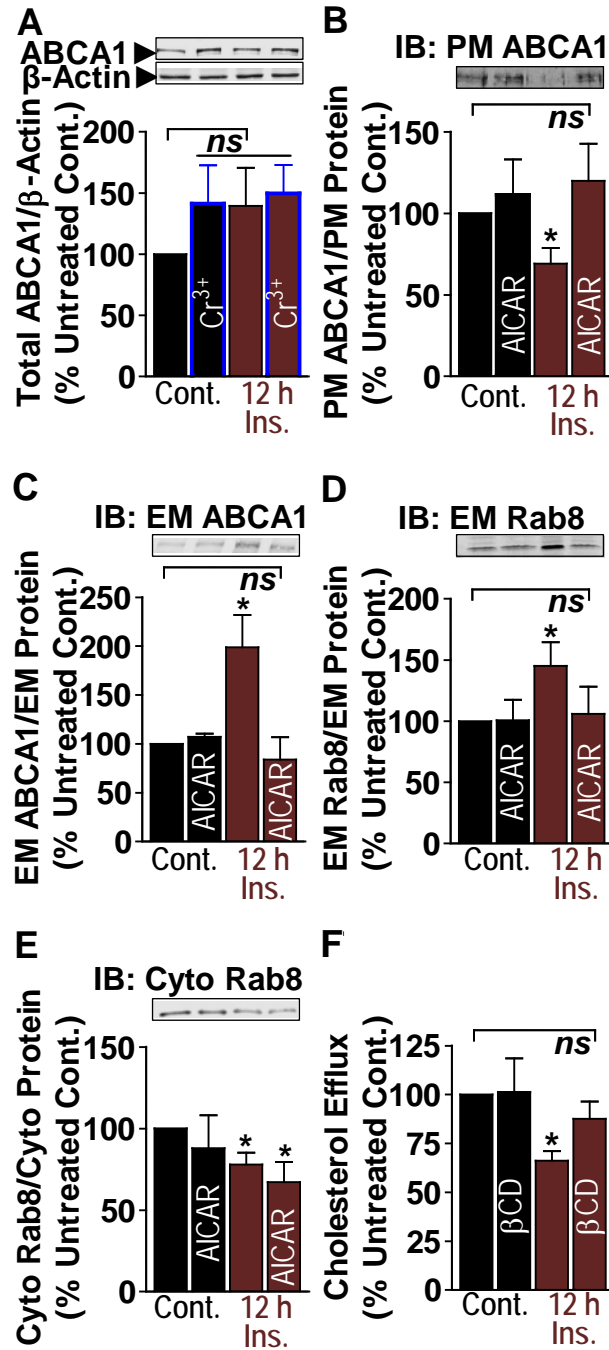

**Fig. S1.** Control (Cont.) or hyperinsulinemic (12h Ins) cells were treated without or with Cr<sup>3+</sup>, AICAR or  $\beta$ CD. (A) Whole cell ABCA1, (B) PM ABCA1, (C) EM ABCA1, (D) EM Rab8, (E) Cyto Rab8, and (E) ApoA-1-mediated cholesterol efflux. N=3-4.

\*P<0.05 versus untreated control.
